# Supplementary material for: A network-biology approach for identification of key genes and pathways involved in malignant peritoneal mesothelioma
Source: PubMed Central journal article supplement (PMC8261271; doi:10.5808/gi.21019), 2021-06-30
Supplement: gi-21019suppl1.pdf [file gi-21019suppl1.pdf]

**Supplementary Table 1.** Highly significant biological processes (adjusted  $p < 0.01$ ) participated by differentially expressed genes

| <b>GO biological process</b>                                                | <b>Adjusted p-value</b> |
|-----------------------------------------------------------------------------|-------------------------|
| Regulation of angiogenesis (GO:0045765)                                     | 7.599E-07               |
| Negative regulation of cell proliferation (GO:0008285)                      | 1.541E-05               |
| Sprouting angiogenesis (GO:0002040)                                         | 9.334E-05               |
| Negative regulation of cellular process (GO:0048523)                        | 0.00019                 |
| Regulation of cell proliferation (GO:0042127)                               | 0.00063                 |
| Negative regulation of angiogenesis (GO:0016525)                            | 0.00082                 |
| Regulation of vasculature development (GO:1901342)                          | 0.00089                 |
| Regulation of inflammatory response (GO:0050727)                            | 0.00192                 |
| Negative regulation of blood vessel morphogenesis (GO:2000181)              | 0.00204                 |
| Negative regulation of cell adhesion (GO:0007162)                           | 0.00184                 |
| Positive regulation of intracellular signal transduction (GO:1902533)       | 0.00193                 |
| Regulation of endothelial cell proliferation (GO:0001936)                   | 0.00180                 |
| Regulation of cardiac conduction (GO:1903779)                               | 0.00192                 |
| Positive regulation of cell proliferation (GO:0008284)                      | 0.00223                 |
| Regulation of anatomical structure morphogenesis (GO:0022603)               | 0.00215                 |
| Cell-cell junction organization (GO:0045216)                                | 0.00320                 |
| Positive regulation of sprouting angiogenesis (GO:1903672)                  | 0.00457                 |
| Regulation of sequestering of triglyceride (GO:0010889)                     | 0.00469                 |
| Negative regulation of cell migration (GO:0030336)                          | 0.00479                 |
| Negative regulation of signal transduction (GO:0009968)                     | 0.00471                 |
| Regulation of macrophage derived foam cell differentiation (GO:0010743)     | 0.00475                 |
| Positive regulation of protein phosphorylation (GO:0001934)                 | 0.00572                 |
| Cell-cell junction assembly (GO:0007043)                                    | 0.00550                 |
| Cellular response to low-density lipoprotein particle stimulus (GO:0071404) | 0.00557                 |
| Positive regulation of glutamate receptor signaling pathway (GO:1900451)    | 0.00551                 |
| Oxygen transport (GO:0015671)                                               | 0.00530                 |
| Valine metabolic process (GO:0006573)                                       | 0.00510                 |
| Positive regulation of cellular biosynthetic process (GO:0031328)           | 0.00492                 |
| Neutrophil mediated immunity (GO:0002446)                                   | 0.00650                 |
| Vasculogenesis (GO:0001570)                                                 | 0.00663                 |
| Cell-cell adhesion mediated by cadherin (GO:0044331)                        | 0.00800                 |
| Response to insulin (GO:0032868)                                            | 0.00833                 |
| Cellular response to cytokine stimulus (GO:0071345)                         | 0.00971                 |
| Cell junction assembly (GO:0034329)                                         | 0.00977                 |
| Positive regulation of angiogenesis (GO:0045766)                            | 0.00956                 |
| Positive regulation of inflammatory response (GO:0050729)                   | 0.00944                 |
| Neutrophil activation involved in immune response (GO:0002283)              | 0.00985                 |
