# Supplementary material for: A network-biology approach for identification of key genes and pathways involved in malignant peritoneal mesothelioma
Source: PubMed Central journal article supplement (PMC8261271; doi:10.5808/gi.21019), 2021-06-30
Supplement: gi-21019suppl2.pdf [file gi-21019suppl2.pdf]

**Supplementary Table 2.** Highly significant molecular functions (adjusted  $p < 0.1$ ) performed by differentially expressed genes

| <b>GO molecular function</b>                                                                                                                                                      | <b>Adjusted p-value</b> |
|-----------------------------------------------------------------------------------------------------------------------------------------------------------------------------------|-------------------------|
| Cytokine activity (GO:0005125)                                                                                                                                                    | 0.00128                 |
| Calcium ion binding (GO:0005509)                                                                                                                                                  | 0.01124                 |
| Integrin binding (GO:0005178)                                                                                                                                                     | 0.01005                 |
| Metal ion binding (GO:0046872)                                                                                                                                                    | 0.01021                 |
| Oxidoreductase activity, acting on paired donors, with incorporation or reduction of molecular Oxygen, NAD(P)H as one donor, and incorporation of one atom of oxygen (GO:0016709) | 0.04736                 |
| Chemokine activity (GO:0008009)                                                                                                                                                   | 0.08246                 |
| Coreceptor activity involved in Wnt signaling pathway, planar cell polarity pathway (GO:1904929)                                                                                  | 0.08460                 |
| Lipoprotein particle binding (GO:0071813)                                                                                                                                         | 0.07671                 |
| Chemokine receptor binding (GO:0042379)                                                                                                                                           | 0.08159                 |
| Oxidoreductase activity, acting on the aldehyde or oxo group of donors, NAD or NADP as Acceptor (GO:0016620)                                                                      | 0.09217                 |

**Supplementary Table 3.** Most probable cellular locations (adjusted  $p$ -value  $< 0.05$ ) of the proteins encoded by differentially expressed genes

| <b>GO cellular location</b>                        | <b>Adjusted p-value</b> |
|----------------------------------------------------|-------------------------|
| lipid droplet (GO:0005811)                         | 0.00018                 |
| membrane raft (GO:0045121)                         | 0.00069                 |
| microvillus (GO:0005902)                           | 0.00473                 |
| actin-based cell projection (GO:0098858)           | 0.00514                 |
| cytoskeleton (GO:0005856)                          | 0.00494                 |
| endoplasmic reticulum lumen (GO:0005788)           | 0.00592                 |
| integral component of plasma membrane (GO:0005887) | 0.00572                 |
| sarcoplasmic reticulum (GO:0016529)                | 0.01093                 |
| perinuclear region of cytoplasm (GO:0048471)       | 0.01152                 |
| caveola (GO:0005901)                               | 0.01179                 |
| sarcoplasm (GO:0016528)                            | 0.0117                  |
| cytoplasmic vesicle lumen (GO:0060205)             | 0.02049                 |
| cortical cytoskeleton (GO:0030863)                 | 0.03153                 |
| ficolin-1-rich granule lumen (GO:1904813)          | 0.04082                 |
| catenin complex (GO:0016342)                       | 0.04087                 |
| platelet alpha granule (GO:0031091)                | 0.04458                 |
| actin cytoskeleton (GO:0015629)                    | 0.04316                 |
| specific granule membrane (GO:0035579)             | 0.04282                 |
