# Supplementary material for: A network-biology approach for identification of key genes and pathways involved in malignant peritoneal mesothelioma
Source: PubMed Central journal article supplement (PMC8261271; doi:10.5808/gi.21019), 2021-06-30
Supplement: gi-21019suppl4.pdf [file gi-21019suppl4.pdf]

**Supplementary Table 4.** Highly significant (adjusted p-value <0.05) biological pathways enriched in differentially expressed genes

| <b>KEGG pathway</b>                                  | <b>Adjusted p-value</b> |
|------------------------------------------------------|-------------------------|
| Malaria                                              | 5.38E-06                |
| PPAR signaling pathway                               | 6.10E-06                |
| Regulation of lipolysis in adipocytes                | 6.50E-05                |
| Cytokine-cytokine receptor interaction               | 0.00087                 |
| AMPK signaling pathway                               | 0.001                   |
| AGE-RAGE signaling pathway in diabetic complications | 0.00251                 |
| Pathways in cancer                                   | 0.00351                 |
| Cell adhesion molecules (CAMs)                       | 0.0051                  |
| Longevity regulating pathway                         | 0.00895                 |
| Thyroid hormone synthesis                            | 0.0118                  |
| Glycerolipid metabolism                              | 0.01344                 |
| PI3K-Akt signaling pathway                           | 0.01341                 |
| Non-alcoholic fatty liver disease (NAFLD)            | 0.01443                 |
| Complement and coagulation cascades                  | 0.01374                 |
| Aldosterone synthesis and secretion                  | 0.01571                 |
| ECM-receptor interaction                             | 0.0158                  |
| HIF-1 signaling pathway                              | 0.01623                 |
| Fluid shear stress and atherosclerosis               | 0.01831                 |
| Adipocytokine signaling pathway                      | 0.01789                 |
| JAK-STAT signaling pathway                           | 0.0204                  |
| Phenylalanine metabolism                             | 0.02114                 |
| Insulin resistance                                   | 0.02264                 |
| Human papillomavirus infection                       | 0.03576                 |
| Apelin signaling pathway                             | 0.03874                 |
| Proteoglycans in cancer                              | 0.04084                 |
| Cortisol synthesis and secretion                     | 0.04044                 |
| Glucagon signaling pathway                           | 0.04594                 |
| Tyrosine metabolism                                  | 0.04756                 |
| Transcriptional misregulation in cancer              | 0.04709                 |
| Proximal tubule bicarbonate reclamation              | 0.04768                 |
| cGMP-PKG signaling pathway                           | 0.04672                 |
| Parathyroid hormone synthesis, secretion and action  | 0.04685                 |
| African trypanosomiasis                              | 0.04551                 |
