# Supplementary material for: A network-biology approach for identification of key genes and pathways involved in malignant peritoneal mesothelioma
Source: PubMed Central journal article supplement (PMC8261271; doi:10.5808/gi.21019), 2021-06-30
Supplement: gi-21019suppl5.pdf [file gi-21019suppl5.pdf]

**Supplementary Table 5.** Drugs/chemical compounds that can interact with the hub proteins

| <b>DrugBank ID</b>                | <b>Name</b>                                    | <b>Drug Group</b>                    | <b>Pharmacological Actions</b> | <b>Role</b>         |
|-----------------------------------|------------------------------------------------|--------------------------------------|--------------------------------|---------------------|
| <b>CDH1</b>                       |                                                |                                      |                                |                     |
| No relevant drug found            |                                                |                                      |                                |                     |
| <b>GAPDH</b>                      |                                                |                                      |                                |                     |
| DB00157                           | NADH                                           | Approved, nutraceutical              | Unknown                        |                     |
| DB02059                           | Adenosine-5-Diphosphoribose                    | Experimental                         | Unknown                        |                     |
| DB03893                           | Thionicotinamide-Adenine-Dinucleotide          | Experimental                         | Unknown                        |                     |
| DB07347                           | 4-(2-Aminoethyl)Benzenesulfonyl Fluoride       | Experimental                         | Unknown                        |                     |
| DB09130                           | Copper                                         | Approved, investigational            | Unknown                        |                     |
| DB09092                           | Xanthinol                                      | Approved, withdrawn                  | Yes                            | Cofactor            |
| DB11638                           | Artemimol                                      | Experimental, investigational        | Unknown                        | Ligand              |
| <b>FGF2</b>                       |                                                |                                      |                                |                     |
| DB00686                           | Pentosan polysulfate                           | Approved                             | Yes                            | Antagonist          |
| DB03935                           | 1,4-Dideoxy-O2-Sulfo-Glucuronic Acid           | Experimental                         | Unknown                        |                     |
| DB03959                           | N,O6-Disulfo-Glucosamine                       | Experimental                         | Unknown                        |                     |
| DB03981                           | 1,4-Dideoxy-5-Dehydro-O2-Sulfo-Glucuronic Acid | Experimental                         | Unknown                        |                     |
| DB05434                           | ABT-510                                        | Investigational                      | Unknown                        |                     |
| DB00877                           | Sirolimus                                      | Approved, investigational            | Yes                            | Other/<br>Unknown   |
| DB00364                           | Sucralfate                                     | Approved                             | Yes                            | Agonist/<br>Inducer |
| DB01109                           | Heparin                                        | Approved, investigational            | Unknown                        |                     |
| <b>MYC Proto-Oncogene Protein</b> |                                                |                                      |                                |                     |
| DB08813                           | Nadroparin                                     | Approved, investigational            | Unknown                        | Inhibitor           |
| DB00945                           | Acetylsalicylic acid                           | Approved, vet_approved               | Unknown                        | Downregulator       |
| <b>PTGS2</b>                      |                                                |                                      |                                |                     |
| DB00154                           | Dihomo-gamma-linolenic acid                    | Investigational, nutraceutical       | Yes                            |                     |
| DB00159                           | Icosapent                                      | Approved, nutraceutical              | Yes                            | Inhibitor           |
| DB00480                           | Lenalidomide                                   | Approved                             | Unknown                        | Negative Modulator  |
| DB00482                           | Celecoxib                                      | Approved, investigational            | Yes                            | Inhibitor           |
| DB00533                           | Rofecoxib                                      | Approved, investigational, withdrawn | Yes                            | Inhibitor           |
| DB00580                           | Valdecoxib                                     | Approved, investigational,           | Yes                            | Inhibitor           |

|         |                      |                                               |         |            |
|---------|----------------------|-----------------------------------------------|---------|------------|
|         |                      | withdrawn                                     |         |            |
| DB00605 | Sulindac             | Approved,<br>investigational                  | Yes     | Inhibitor  |
| DB00712 | Flurbiprofen         | approved,<br>investigational                  | Yes     | Inhibitor  |
| DB00784 | Mefenamic acid       | Approved                                      | Yes     | Inhibitor  |
| DB00812 | Phenylbutazone       | Approved,<br>vet_approved                     | Yes     | Inhibitor  |
| DB00821 | Carprofen            | Approved,<br>vet_approved,<br>withdrawn       | Yes     | Inhibitor  |
| DB00991 | Oxaprozin            | Approved                                      | Yes     | Inhibitor  |
| DB00244 | Mesalazine           | Approved                                      | Yes     | Inhibitor  |
| DB00316 | Acetaminophen        | Approved                                      | Yes     | Inhibitor  |
| DB00328 | Indomethacin         | Approved,<br>investigational                  | Yes     | Inhibitor  |
| DB00461 | Nabumetone           | Approved                                      | Yes     | Inhibitor  |
| DB00465 | Ketorolac            | Approved                                      | Yes     | Inhibitor  |
| DB00469 | Tenoxicam            | Approved                                      | Yes     | Inhibitor  |
| DB00500 | Tolmetin             | Approved                                      | Yes     | Inhibitor  |
| DB00573 | Fenoprofen           | Approved                                      | Yes     | Inhibitor  |
| DB00586 | Diclofenac           | Approved,<br>vet_approved                     | Yes     | Inhibitor  |
| DB00749 | Etodolac             | Approved,<br>investigational,<br>vet_approved | Yes     | Inhibitor  |
| DB00788 | Naproxen             | Approved,<br>vet_approved                     | Yes     | Inhibitor  |
| DB00814 | Meloxicam            | Approved,<br>vet_approved                     | Yes     | Inhibitor  |
| DB00861 | Diflunisal           | Approved,<br>investigational                  | Yes     | Inhibitor  |
| DB00870 | Suprofen             | Approved,<br>withdrawn                        | Yes     | Inhibitor  |
| DB00939 | Meclofenamic acid    | Approved,<br>vet_approved                     | Yes     | Inhibitor  |
| DB00945 | Acetylsalicylic acid | Approved,<br>vet_approved                     | Yes     | Inhibitor  |
| DB00963 | Bromfenac            | Approved                                      | Yes     | Inhibitor  |
| DB01009 | Ketoprofen           | Approved,<br>vet_approved                     | Yes     | Inhibitor  |
| DB01014 | Balsalazide          | Approved,<br>investigational                  | Yes     | Inhibitor  |
| DB01050 | Ibuprofen            | Approved                                      | Yes     | Inhibitor  |
| DB01283 | Lumiracoxib          | Approved,<br>investigational                  | Yes     | Inhibitor  |
| DB01399 | Salsalate            | Approved                                      | Yes     | Inhibitor  |
| DB00936 | Salicylic acid       | Approved,<br>investigational,<br>vet_approved | Yes     | Inhibitor  |
| DB01041 | Thalidomide          | Approved,<br>investigational,                 | Unknown | Antagonist |

|         |                                                                 |                                          |         |                       |
|---------|-----------------------------------------------------------------|------------------------------------------|---------|-----------------------|
|         |                                                                 | withdrawn                                |         |                       |
| DB01404 | Ginseng                                                         | Approved, investigational, nutraceutical | Unknown | Inhibitor             |
| DB01628 | Etoricoxib                                                      | Approved, investigational                | Yes     | Inhibitor             |
| DB01600 | Tiaprofenic acid                                                | Approved                                 | Yes     | Inhibitor             |
| DB04743 | Nimesulide                                                      | Approved, investigational, withdrawn     | Yes     | Inhibitor             |
| DB02709 | Resveratrol                                                     | Investigational                          | Unknown | Inhibitor             |
| DB04725 | Licofelone                                                      | Investigational                          | Unknown | Inhibitor             |
| DB05095 | Cimicoxib                                                       | Investigational                          | Unknown | Inhibitor             |
| DB02266 | Flufenamic acid                                                 | Approved                                 | Unknown | Inhibitor             |
| DB00554 | Piroxicam                                                       | Approved, investigational                | Yes     | Inhibitor             |
| DB01397 | Magnesium salicylate                                            | Experimental                             | Yes     | Inhibitor             |
| DB00250 | Dapsone                                                         | Approved, investigational                | Unknown | Substrate             |
| DB01041 | Thalidomide                                                     | Approved, investigational, withdrawn     | Unknown | Substrate             |
| DB06725 | Lornoxicam                                                      | Approved, investigational                | Yes     | Inhibitor             |
| DB03866 | Prostaglandin G2                                                | Experimental                             | Unknown |                       |
| DB03477 | 1-Phenylsulfonamide-3-Trifluoromethyl-5-Parabromophenylpyrazole | Experimental                             | Unknown |                       |
| DB06802 | Nepafenac                                                       | Approved, investigational                | Unknown | Inhibitor             |
| DB00795 | Sulfasalazine                                                   | Approved                                 | Yes     | Inhibitor             |
| DB04552 | Niflumic acid                                                   | Experimental                             | Yes     | Inhibitor             |
| DB01435 | Antipyrine                                                      | Approved, investigational                | Unknown | Inhibitor             |
| DB01419 | Antrafenine                                                     | Approved                                 | Unknown | Inhibitor             |
| DB01401 | Choline magnesium trisalicylate                                 | Approved                                 | Unknown | Inhibitor             |
| DB00233 | Aminosalicylic acid                                             | Approved                                 | Unknown | Inhibitor             |
| DB00963 | Bromfenac                                                       | Approved                                 | Unknown | Inhibitor             |
| DB00887 | Bumetanide                                                      | Approved                                 | Unknown | Inhibitor             |
| DB06774 | Capsaicin                                                       | Approved                                 | Unknown | Inhibitor             |
| DB00856 | Chlorphenesin                                                   | Approved, experimental                   | Unknown | Inhibitor             |
| DB05095 | Cimicoxib                                                       | Investigational                          | Unknown | Inhibitor             |
| DB00720 | Clodronic acid                                                  | Approved, investigational, vet_approved  | Unknown | Inhibitor             |
| DB06195 | Seliciclib                                                      | Investigational                          | Unknown | Inhibitor             |
| DB00035 | Desmopressin                                                    | Approved                                 | Unknown | Inducer               |
| DB05804 | Prasterone sulfate                                              | Investigational                          | Unknown | Inducer               |
| DB01395 | Drospirenone                                                    | Approved                                 | Unknown | Inhibitor/<br>Inducer |
| DB06804 | Nonoxynol-9                                                     | Approved, withdrawn                      | Unknown | Inducer               |

|         |                              |                            |         |            |
|---------|------------------------------|----------------------------|---------|------------|
| DB00515 | Cisplatin                    | Approved                   | Unknown | Inhibitor  |
| DB00884 | Risedronic acid              | Approved, investigational  | Unknown | Inducer    |
| DB00360 | Sapropterin                  | Approved, investigational  | Unknown | Inducer    |
| DB06436 | Semaxanib                    | Investigational            | Unknown | Inducer    |
| DB05875 | Sar9, Met (O2)11-Substance P | Investigational            | Unknown | Inducer    |
| DB00041 | Aldesleukin                  | Approved                   | Unknown | Inducer    |
| DB00620 | Triamcinolone                | Approved, vet_approved     | Unknown | Inhibitor  |
| DB08819 | Tafluprost                   | Approved                   | Unknown | Inducer    |
| DB08910 | Pomalidomide                 | Approved                   | Yes     | Inhibitor  |
| DB00773 | Etoposide                    | Approved                   | Unknown | Substrate  |
| DB08439 | Parecoxib                    | Approved                   | Yes     | Inhibitor  |
| DB09217 | Firocoxib                    | Experimental, vet_approved | Unknown |            |
| DB13167 | Alclofenac                   | Approved, withdrawn        | Yes     | Antagonist |
| DB09213 | Dexibuprofen                 | Approved, investigational  | Yes     | Inhibitor  |
| DB11133 | Omega-3 fatty acids          | Approved, nutraceutical    | Unknown | Substrate  |
| DB13168 | Omega-6 fatty acids          | Nutraceutical              | Unknown | Substrate  |
| DB06736 | Aceclofenac                  | Approved, investigational  | Yes     | Inhibitor  |
| DB13783 | Acemetacin                   | Approved, investigational  | Yes     | Antagonist |
| DB09215 | Droxicam                     | Withdrawn                  | Yes     | Inhibitor  |
| DB09212 | Loxoprofen                   | Approved                   | Yes     | Antagonist |
| DB09216 | Tolfenamic acid              | Approved, investigational  | Yes     | Antagonist |
| DB09214 | Dexketoprofen                | Approved, investigational  | Unknown | Antagonist |
| DB09214 | Dexketoprofen                | Approved, investigational  | Unknown | Inhibitor  |
| DB09295 | Talniflumate                 | Experimental               | Unknown | Antagonist |
| DB09295 | Talniflumate                 | Experimental               | Unknown | Inhibitor  |
| DB09285 | Morniflumate                 | Experimental               | Unknown |            |
| DB09285 | Morniflumate                 | Experimental               | Unknown | Inhibitor  |
| DB09288 | Propacetamol                 | Experimental               | Yes     | Antagonist |
| DB11079 | Trolamine salicylate         | Approved                   | Yes     | Inhibitor  |
| DB11071 | Phenyl salicylate            | Approved                   | Unknown | Antagonist |
| DB13346 | Bufexamac                    | Approved, withdrawn        | Yes     | Inhibitor  |
| DB11327 | Dipyrithione                 | Approved                   | Unknown |            |
| DB13961 | Fish oil                     | Approved, nutraceutical    | Yes     | Inhibitor  |
| DB11323 | Glycol salicylate            | Approved                   | Yes     | Antagonist |
| DB11201 | Menthyl salicylate           | Approved                   | Yes     | Antagonist |
| DB13501 | Bendazac                     | Approved, withdrawn        | Unknown |            |
| DB09061 | Cannabidiol                  | Approved,                  | Unknown | Inhibitor  |

|                        |                                                                                         |                                            |         |            |
|------------------------|-----------------------------------------------------------------------------------------|--------------------------------------------|---------|------------|
|                        |                                                                                         | investigational                            |         |            |
| DB14011                | Nabiximols                                                                              | Investigational                            | Unknown | Inhibitor  |
| DB14009                | Medical Cannabis                                                                        | Experimental,<br>investigational           | Unknown | Inhibitor  |
| DB11752                | Bryostatin 1                                                                            | Investigational                            | Unknown | Inducer    |
| <b>TEK</b>             |                                                                                         |                                            |         |            |
| DB08221                | N-{4-METHYL-3-[(3-PYRIMIDIN-4-YLPYRIDIN-2-YL)AMINO]PHENYL}-3-(TRIFLUOROMETHYL)BENZAMIDE | Experimental                               | Unknown |            |
| DB05294                | Vandetanib                                                                              | Approved                                   | Unknown | Inhibitor  |
| DB08896                | Regorafenib                                                                             | Approved                                   | Yes     | Inhibitor  |
| DB08901                | Ponatinib                                                                               | Approved,<br>investigational               | Unknown | Inhibitor  |
| DB00415                | Ampicillin                                                                              | Approved,<br>vet_approved                  | Unknown |            |
| DB12010                | Fostamatinib                                                                            | Approved,<br>investigational               | Unknown | Inhibitor  |
| DB14840                | Ripretinib                                                                              | Approved                                   | Yes     | Inhibitor  |
| <b>VWF</b>             |                                                                                         |                                            |         |            |
| DB00025                | Antihemophilic factor, human recombinant                                                | Approved,<br>investigational               | Yes     | Binder     |
| DB05202                | Egaptivon pegol                                                                         | investigational                            | Unknown |            |
| DB06081                | Caplacizumab                                                                            | Approved,<br>investigational               | Unknown |            |
| DB09108                | Simoctocog alfa                                                                         | Approved                                   | Yes     | Binding    |
| DB11606                | Susoctocog alfa                                                                         | Approved,<br>investigational               | Yes     | Binding    |
| DB11607                | Efmoroctocog alfa                                                                       | Approved,<br>investigational               | Yes     | Binding    |
| DB09329                | Antihemophilic Factor (Recombinant), PEGylated                                          | Approved,<br>investigational               | Yes     | Binder     |
| DB09329                | Antihemophilic Factor (Recombinant), PEGylated                                          | Approved,<br>investigational               | Unknown |            |
| DB13998                | Lonoctocog alfa                                                                         | Approved,<br>investigational               | Yes     | Binder     |
| DB13999                | Moroctocog alfa                                                                         | Approved                                   | Yes     | Binder     |
| DB14738                | Turoctocog alfa pegol                                                                   | Approved                                   | Yes     | Binder     |
| <b>CDH5</b>            |                                                                                         |                                            |         |            |
| DB05685                | FX06                                                                                    | Investigational                            | Unknown |            |
| DB00480                | Lenalidomide                                                                            | Approved                                   | Unknown | Antagonist |
| <b>CXCL8/IL8</b>       |                                                                                         |                                            |         |            |
| DB05434                | ABT-510                                                                                 | Investigational                            | Unknown |            |
| DB05484                | MDX-018                                                                                 | Investigational                            | Unknown |            |
| DB05855                | Rivacicline                                                                             | Investigational                            | Unknown | Antagonist |
| DB06083                | Tapinarof                                                                               | Investigational                            | Unknown |            |
| <b>ADIPOQ</b>          |                                                                                         |                                            |         |            |
| No Relevant Drug Found |                                                                                         |                                            |         |            |
| <b>PPARG</b>           |                                                                                         |                                            |         |            |
| DB00197                | Troglitazone                                                                            | Approved,<br>investigational,<br>withdrawn | Yes     | Agonist    |
| DB00412                | Rosiglitazone                                                                           | Approved,                                  | Yes     | Agonist    |

|         |                                                                                                       |                           |         |                 |
|---------|-------------------------------------------------------------------------------------------------------|---------------------------|---------|-----------------|
|         |                                                                                                       | investigational           |         |                 |
| DB01132 | Pioglitazone                                                                                          | Approved, investigational | Yes     | Agonist         |
| DB00159 | Icosapent                                                                                             | Approved, nutraceutical   | Yes     | Agonist         |
| DB04971 | Reglitazar                                                                                            | Investigational           | Unknown |                 |
| DB04689 | 2-{5-[3-(6-BENZOYL-1-PROPYLNAPHTHALEN-2-YLOXY)PROPOXY]INDOL-1-YL}ETHANOIC ACID                        | Experimental              | Unknown |                 |
| DB05187 | Elafibranor                                                                                           | investigational           | Unknown |                 |
| DB05490 | AMG-131                                                                                               | investigational           | Yes     | Partial agonist |
| DB05854 | CLX-0921                                                                                              | investigational           | Unknown |                 |
| DB11811 | Arhalofenate                                                                                          | investigational           | Unknown |                 |
| DB12662 | Naveglitazar                                                                                          | investigational           | Unknown |                 |
| DB06510 | Muraglitazar                                                                                          | investigational           | Unknown |                 |
| DB06521 | Ertiprotafib                                                                                          | investigational           | Unknown |                 |
| DB06533 | Ragaglitazar                                                                                          | investigational           | Unknown |                 |
| DB06536 | Tesaglitazar                                                                                          | investigational           | Unknown |                 |
| DB00328 | Indomethacin                                                                                          | Approved, investigational | Unknown | Activator       |
| DB00731 | Nateglinide                                                                                           | Approved, investigational | Unknown | Agonist         |
| DB00912 | Repaglinide                                                                                           | Approved, investigational | Unknown | Agonist         |
| DB01252 | Mitiglinide                                                                                           | Approved, investigational | Unknown | Agonist         |
| DB01067 | Glipizide                                                                                             | Approved, investigational | Unknown | Agonist         |
| DB00966 | Telmisartan                                                                                           | Approved, investigational | Yes     | Partial agonist |
| DB01014 | Balsalazide                                                                                           | Approved, investigational | Yes     | Agonist         |
| DB01393 | Bezafibrate                                                                                           | Approved, investigational | Yes     | Agonist         |
| DB06908 | (2S)-3-(1-{[2-(2-CHLOROPHENYL)-5-METHYL-1,3-OXAZOL-4-YL]METHYL}-1H-INDOL-5-YL)-2-ETHOXYPROPANOIC ACID | Experimental              | Unknown |                 |
| DB06926 | (9Z,11E,13S)-13-hydroxyoctadeca-9,11-dienoic acid                                                     | Experimental              | Unknown |                 |
| DB07053 | 2-{5-[3-(7-PROPYL-3-TRIFLUOROMETHYLBENZO[D]ISOXAZOL-6-YLOXY)PROPOXY]INDOL-1-YL}ETHANOIC ACID          | Experimental              | Unknown |                 |
| DB07111 | (4S,5E,7Z,10Z,13Z,16Z,19Z)-4-hydroxydocosa-5,7,10,13,16,19-hexaenoic acid                             | Experimental              | Unknown |                 |
| DB07172 | (5R,6E,8Z,11Z,14Z,17Z)-5-hydroxyicosa-6,8,11,14,17-pentaenoic acid                                    | Experimental              | Unknown |                 |
| DB07208 | (8E,10S,12Z)-10-hydroxy-6-oxooctadeca-8,12-dienoic acid                                               | Experimental              | Unknown |                 |
| DB07209 | (8R,9Z,12Z)-8-hydroxy-6-oxooctadeca-9,12-                                                             | Experimental              | Unknown |                 |

|         |                                                                                                   |                                          |         |           |
|---------|---------------------------------------------------------------------------------------------------|------------------------------------------|---------|-----------|
|         | dienoic acid                                                                                      |                                          |         |           |
| DB07302 | 9(S)-HODE                                                                                         | Experimental                             | Unknown |           |
| DB07509 | difluoro(5-{2-[(5-octyl-1H-pyrrol-2-yl-kappaN)methylidene]-2H-pyrrol-5-yl-kappaN}pentanoato)boron | Experimental                             | Unknown |           |
| DB07675 | (2S)-2-ETHOXY-3-{4-[2-(10H-PHENOXAZIN-10-YL)ETHOXY]PHENYL}PROPANOIC ACID                          | Experimental                             | Unknown |           |
| DB07723 | 3-(5-methoxy-1H-indol-3-yl)propanoic acid                                                         | Experimental                             | Unknown |           |
| DB07724 | Indeglitazar                                                                                      | Experimental                             | Unknown |           |
| DB07842 | (2S)-2-(4-ethylphenoxy)-3-phenylpropanoic acid                                                    | Experimental                             | Unknown |           |
| DB07863 | 2-chloro-5-nitro-N-phenylbenzamide                                                                | Experimental                             | Unknown |           |
| DB08121 | (2S)-2-(biphenyl-4-yloxy)-3-phenylpropanoic acid                                                  | Experimental                             | Unknown |           |
| DB08302 | 3-[5-(2-nitropent-1-en-1-yl)furan-2-yl]benzoic acid                                               | Experimental                             | Unknown |           |
| DB08402 | 2-[(2,4-DICHLOROBENZOYL)AMINO]-5-(PYRIMIDIN-2-YLOXY)BENZOIC ACID                                  | Experimental                             | Unknown |           |
| DB08435 | (5E,14E)-11-oxoprostanoic acid                                                                    | Experimental                             | Unknown |           |
| DB08560 | 3-FLUORO-N-[1-(4-FLUOROPHENYL)-3-(2-THIENYL)-1H-PYRAZOL-5-YL]BENZENESULFONAMIDE                   | Experimental                             | Unknown |           |
| DB04270 | (S)-3-(4-(2-Carbazol-9-Yl-Ethoxy)-Phenyl)-2-Ethoxy-Propionic Acid                                 | Experimental                             | Unknown |           |
| DB08760 | (2S)-2-(4-chlorophenoxy)-3-phenylpropanoic acid                                                   | Experimental                             | Unknown |           |
| DB00244 | Mesalazine                                                                                        | Approved                                 | Yes     | Agonist   |
| DB00795 | Sulfasalazine                                                                                     | Approved                                 | Yes     | Agonist   |
| DB01050 | Ibuprofen                                                                                         | Approved                                 | Unknown | Activator |
| DB08915 | Aleglitazar                                                                                       | Investigational                          | Yes     | Agonist   |
| DB09213 | Dexibuprofen                                                                                      | Approved, investigational                | Unknown | Activator |
| DB11133 | Omega-3 fatty acids                                                                               | Approved, nutraceutical                  | Yes     | Ligand    |
| DB03756 | Doconexent                                                                                        | Approved, investigational                | Yes     | Ligand    |
| DB09198 | Lobeglitazone                                                                                     | Experimental                             | Yes     | Activator |
| DB09006 | Clinofibrate                                                                                      | Experimental                             | Unknown |           |
| DB09201 | Ciglitazone                                                                                       | Experimental                             | Unknown |           |
| DB11672 | Curcumin                                                                                          | Approved, experimental, investigational  | Unknown |           |
| DB00132 | alpha-Linolenic acid                                                                              | Approved, investigational, nutraceutical | Unknown |           |
| DB02746 | Phthalic Acid                                                                                     | Experimental                             | Unknown |           |
| DB02709 | Resveratrol                                                                                       | Investigational                          | Unknown |           |
| DB01118 | Amiodarone                                                                                        | Approved, investigational                | Unknown | Agonist   |
| DB00313 | Valproic acid                                                                                     | Approved, investigational                | Unknown |           |

|            |                                  |                                                |         |                         |
|------------|----------------------------------|------------------------------------------------|---------|-------------------------|
| DB03600    | Capric acid                      | Experimental                                   | Unknown | Ligand                  |
| DB04224    | Oleic Acid                       | Approved,<br>investigational,<br>vet_approved  | Unknown | Ligand                  |
| DB08604    | Triclosan                        | Approved,<br>investigational                   | Unknown |                         |
| DB00573    | Fenoprofen                       | Approved                                       | Unknown |                         |
| DB02266    | Flufenamic acid                  | Approved                                       | Unknown | Agonist                 |
| DB09061    | Cannabidiol                      | Approved,<br>investigational                   | Unknown | Activator               |
| DB13873    | Fenofibric acid                  | Approved                                       | Unknown |                         |
| DB14011    | Nabiximols                       | Investigational                                | Unknown |                         |
| DB14009    | Medical Cannabis                 | Experimental,<br>investigational               | Unknown |                         |
| DB13961    | Fish oil                         | Approved,<br>nutraceutical                     | Unknown |                         |
| DB14034    | Darglitazone                     | Experimental                                   | Unknown | Agonist                 |
| DB12007    | Isoflavone                       | Experimental                                   | Unknown | Agonist                 |
| DB14635    | Curcumin sulfate                 | Experimental                                   | Unknown |                         |
| DB00845    | Clofazimine                      | Approved,<br>investigational                   | Unknown | Modulator               |
| <b>IL6</b> |                                  |                                                |         |                         |
| DB01404    | Ginseng                          | Approved,<br>investigational,<br>nutraceutical | Unknown | Antagonist              |
| DB05017    | YSIL6                            | Investigational                                | Unknown |                         |
| DB05470    | VX-702                           | Investigational                                | Unknown |                         |
| DB05513    | Atiprimod                        | Investigational                                | Unknown |                         |
| DB05744    | CRx-139                          | Investigational                                | Unknown |                         |
| DB05767    | Andrographolide                  | Investigational                                | Unknown |                         |
| DB06083    | Tapinarof                        | Investigational                                | Unknown |                         |
| DB09036    | Siltuximab                       | Approved,<br>investigational                   | Yes     | Antagonist/<br>Antibody |
| DB09221    | Polaprezinc                      | Experimental                                   | Unknown | Inhibitor               |
| DB10770    | Foreskin fibroblast (neonatal)   | Approved                                       | Unknown | Agonist                 |
| DB10772    | Foreskin keratinocyte (neonatal) | Approved                                       | Yes     | Agonist                 |
| DB11967    | Binimetinib                      | Approved,<br>investigational                   | Unknown |                         |
| DB12140    | Dilmapimod                       | Investigational                                | Unknown |                         |
