# Supplementary material for: A network-biology approach for identification of key genes and pathways involved in malignant peritoneal mesothelioma
Source: PubMed Central journal article supplement (PMC8261271; doi:10.5808/gi.21019), 2021-06-30
Supplement: gi-21019suppl6.pdf [file gi-21019suppl6.pdf]

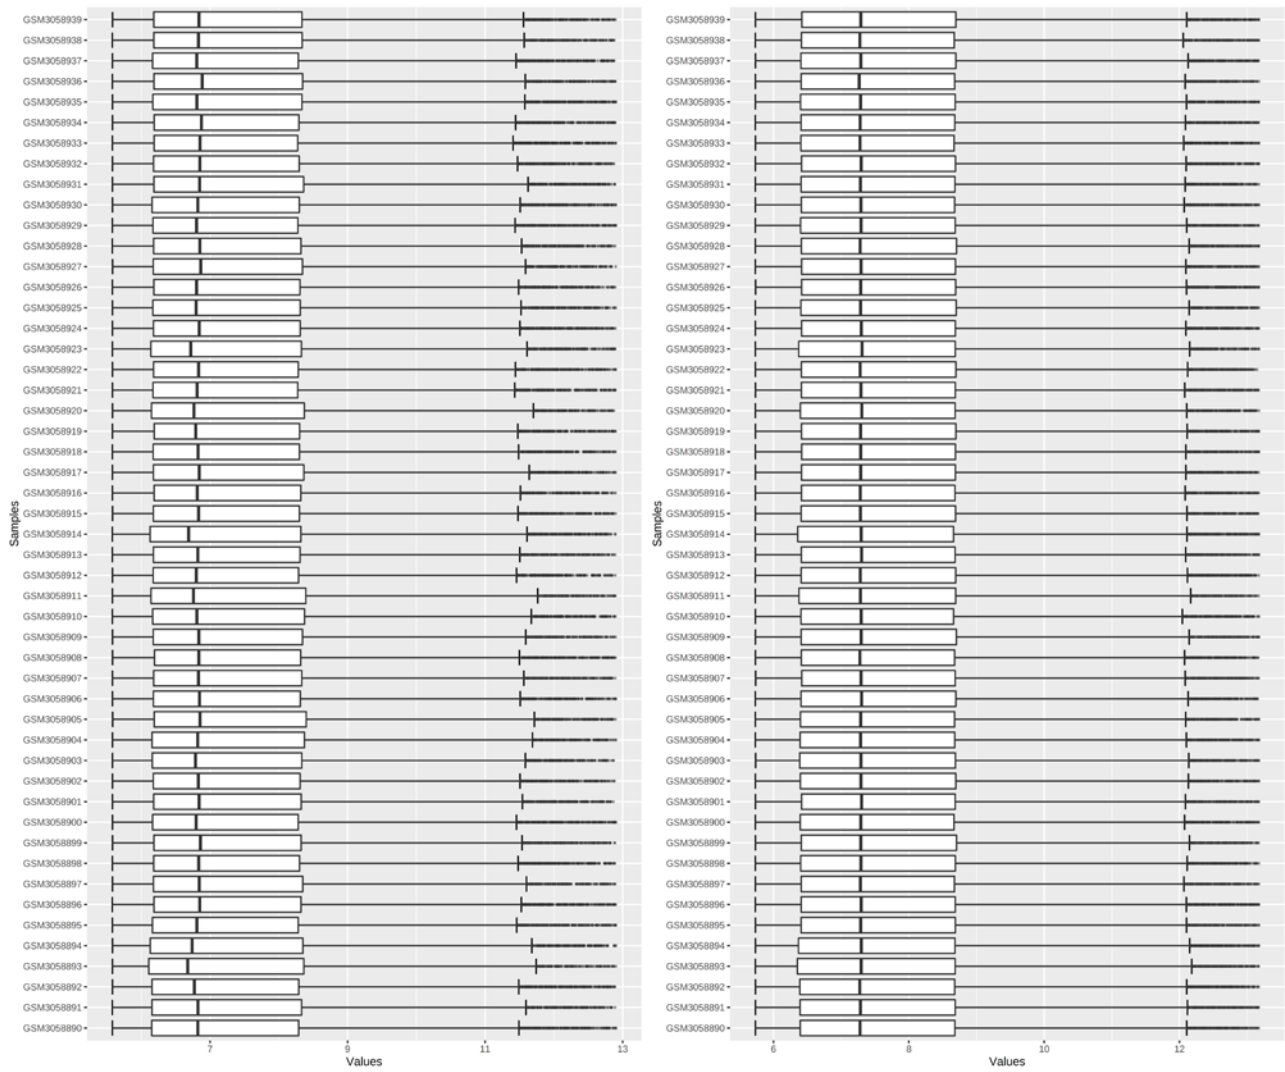

**Supplementary Fig. 1.** Box plot presentation of microarray samples. The left-sided box plots represent data before normalization and the right-sided box plots represent data after normalization.
