# Supplementary material for: A network-biology approach for identification of key genes and pathways involved in malignant peritoneal mesothelioma
Source: PubMed Central journal article supplement (PMC8261271; doi:10.5808/gi.21019), 2021-06-30
Supplement: gi-21019suppl7.pdf [file gi-21019suppl7.pdf]

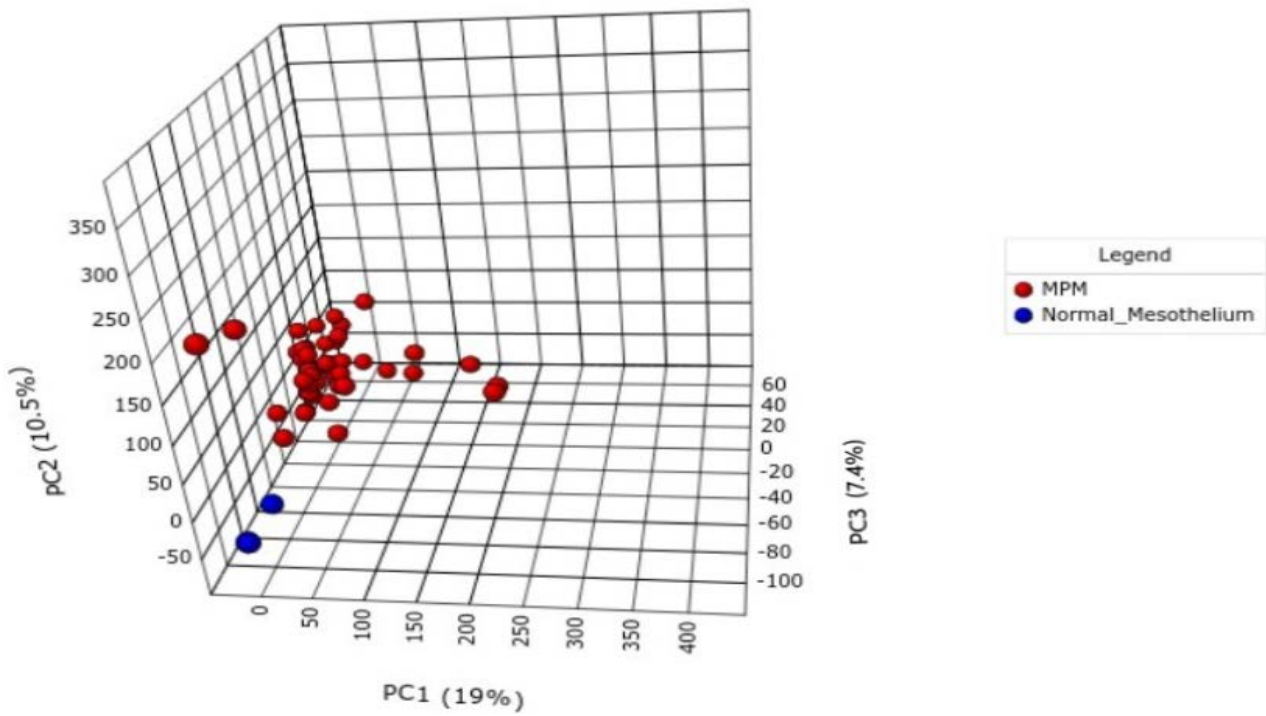

**Supplementary Fig. 2.** Three-dimensional principal component analysis (PCA) plot shows clustering of normal mesothelium and malignant peritoneal mesothelioma (MPM) samples present in the GSE112154 dataset.
