# Supplementary material for: A network-biology approach for identification of key genes and pathways involved in malignant peritoneal mesothelioma
Source: PubMed Central journal article supplement (PMC8261271; doi:10.5808/gi.21019), 2021-06-30
Supplement: gi-21019suppl8.pdf [file gi-21019suppl8.pdf]

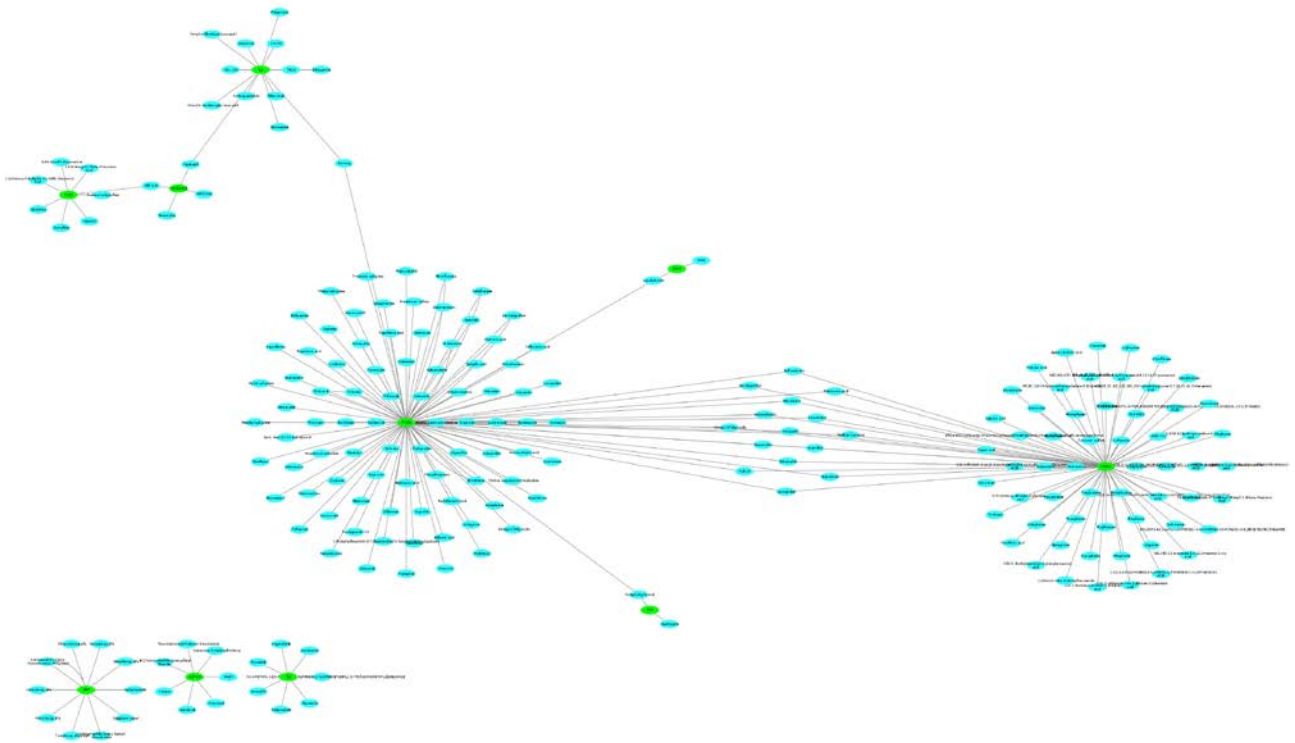

**Supplementary Fig. 3.** Hub protein-Drug Interaction network (visualized in Cytoscape). The hub proteins are colored green and the drug compounds are colored cyan.
